# Supplementary material
Source: HighWire-hosted journal article supplement (https://bmjopen.bmj.com/content/12/2/e053183)
Supplement: inline-supplementary-material-3 [file inline-supplementary-material-3.pdf]

### Supplementary file 3

#### Draft outline of a 5-minute face-to-face consultation (VBI)

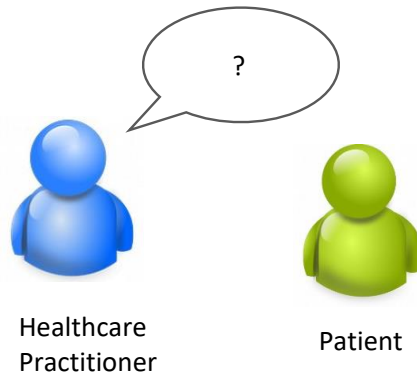

- Start the consultation with de-stigmatising medication non-adherence – forgetting to take tablets and/or having concerns is common.
- Support is available. Introduce the digital support (SMS texts or mobile phone app) as a (fun?) way to help patients take them – perhaps share personal experience with using it, demonstrate a key feature of the app/ text-messaging support.
- Complete short online questionnaire on behalf of patient:
  - Input basic information (patient name, age, mobile phone number)
  - Choose from drop down list of medications that patient is prescribed (tablet name, dose, frequency)
  - Ask patients to give their main reasons for not taking their medication (e.g. choose top 3 reasons from a list, or rank from most important to least important).
- Generate a code for patients to download the app/start the support. E.g. QR code, link to website for patients to download app.
- Hand out pamphlet with further information.
- Endorse the patients' use of digital support.
- Record in the system for follow-up purposes.

*PAM HCP interviews VBI example*
